# Supplementary material for: Defective MZrOx-supported Pt catalysts for catalytic oxidation of glycerol: tailoring oxygen vacancy over the support
Source: Royal Society of Chemistry journal article supplement (doi:10.1039/d4nj03861d), 2024-11-19
Supplement: d4nj03861d1.pdf [file d4nj03861d1.pdf]

Supporting Information

**Defective MZrO<sub>x</sub> supported Pt catalysts for catalytic  
oxidation of glycerol: tailoring oxygen vacancy over the  
support**

Shou-Jiang Han<sup>1,2</sup>, Xue Wang<sup>1,2</sup>, Bin Zhang<sup>3</sup>, Hong Yuan<sup>1,2</sup>, Hai Liu<sup>1,2</sup>, Yi-Hu Ke<sup>1,2\*</sup>

<sup>1</sup> *School of Chemistry and Chemical Engineering, Key Laboratory for Chemical Engineering and  
Technology, State Ethnic Affairs Commission, North Minzu University, Yinchuan 750021, P. R.*

*China*

<sup>2</sup> *Ningxia Key Laboratory of Solar Chemical Conversion Technology, North Minzu University,*

*Yinchuan 750021, P. R. China*

<sup>3</sup> *College of Chemical Engineering, Northwest Minzu University, Lanzhou 730124, P. R. China*

\* To whom correspondence should be addressed. E-mail: [keyihu123@nmu.edu.cn](mailto:keyihu123@nmu.edu.cn)

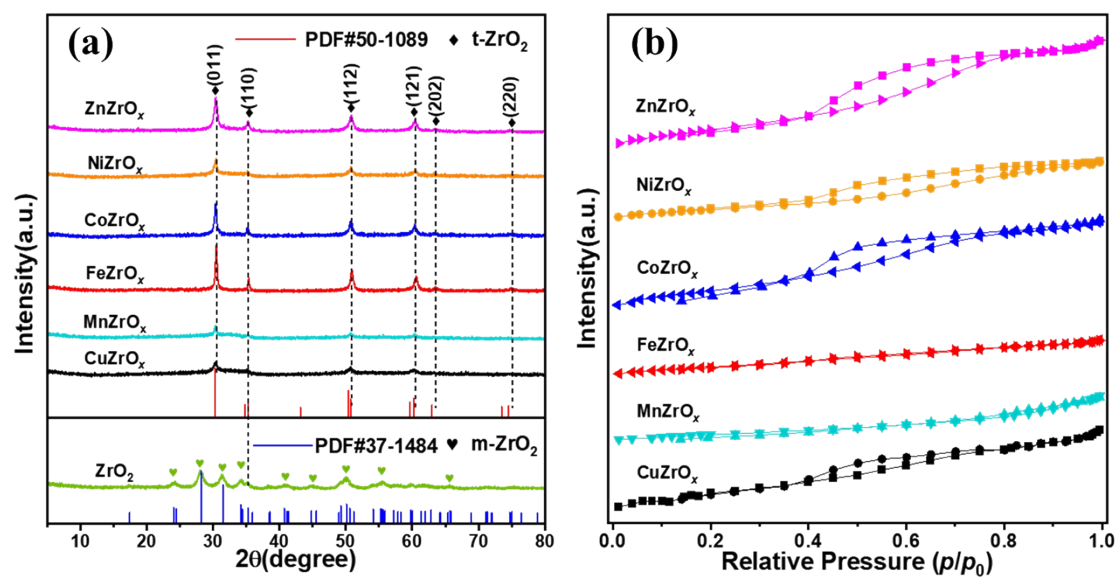

Fig. S1 (a) XRD patterns, (b)  $N_2$  adsorption-desorption isotherms of  $MZrO_x$  supports.

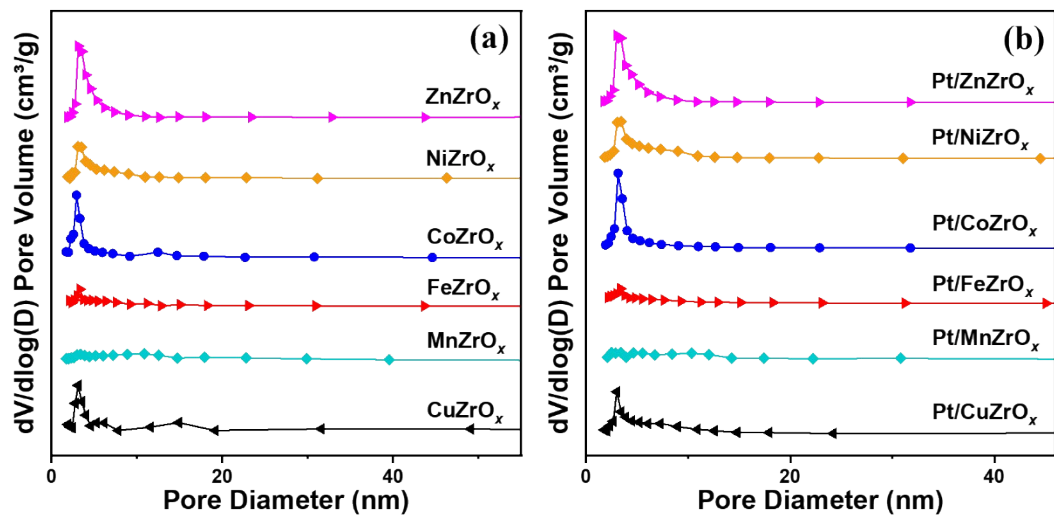

Fig. S2 (a)  $\text{MZrO}_x$  supports, (b)  $\text{Pt/MZrO}_x$  catalysts of pore diameter distribution.

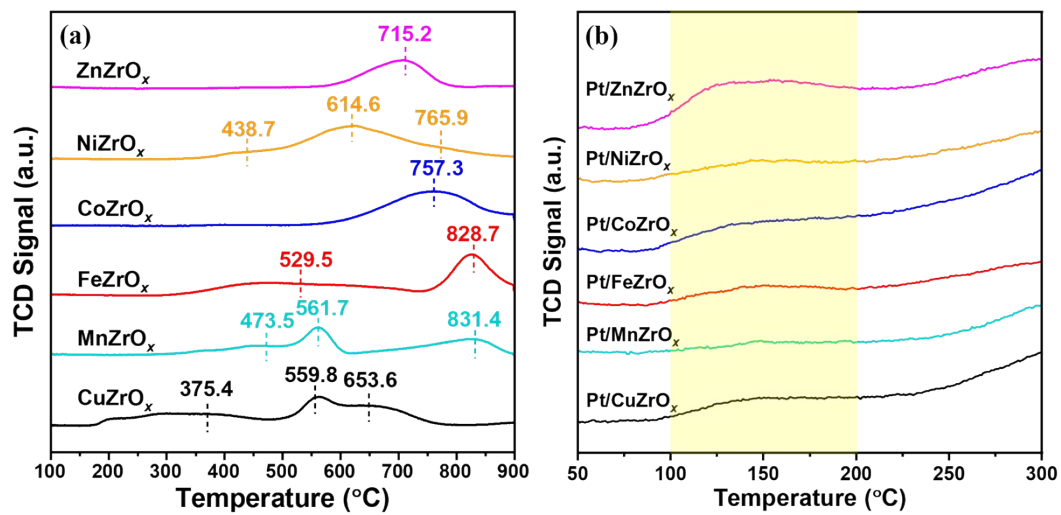

Fig. S3 (a) H<sub>2</sub>-TPR curves of MZrO<sub>x</sub> supports, (b)NH<sub>3</sub>-TPD curves zoomed views in the range of 50~300 °C of Pt/MZrO<sub>x</sub> catalysts.

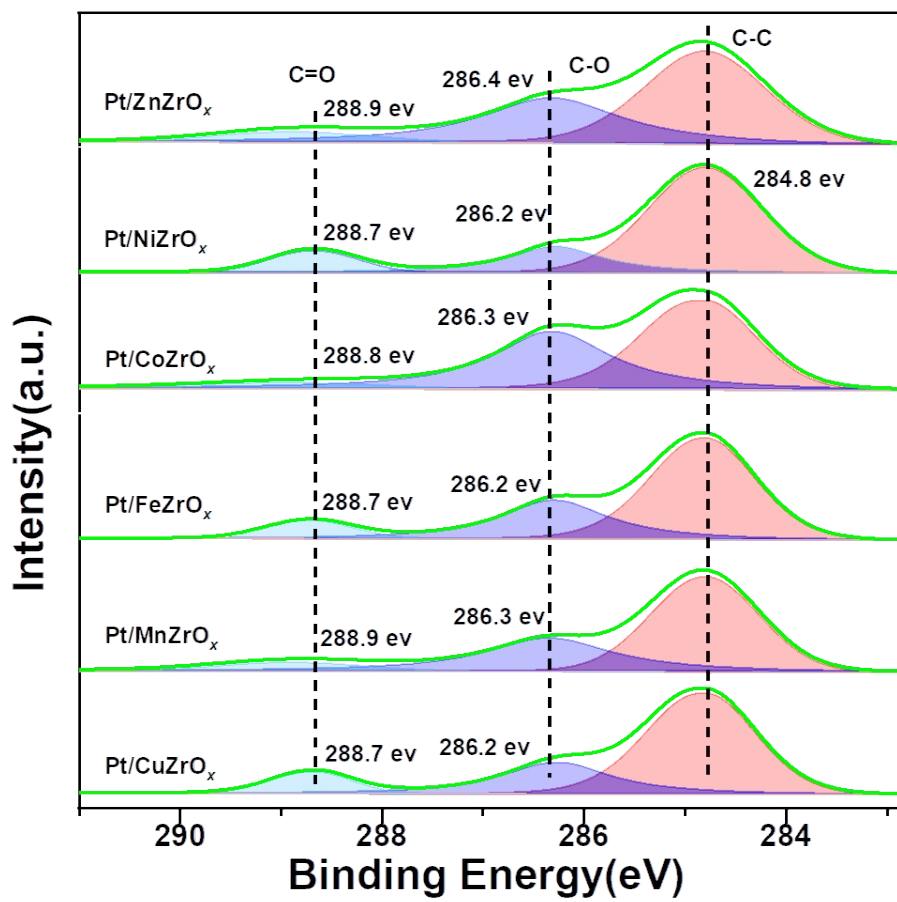

Fig. S4 C 1s of Pt/MZrO<sub>x</sub> catalysts.

Table S1 Physicochemical properties of the MZrO<sub>x</sub> supports.

| Catalyst           | S <sub>BET</sub> (m <sup>2</sup> ·g <sup>-1</sup> ) | V <sub>P</sub> (m <sup>3</sup> ·g <sup>-1</sup> ) | D <sub>P</sub> (nm) |
|--------------------|-----------------------------------------------------|---------------------------------------------------|---------------------|
| CuZrO <sub>x</sub> | 26.61                                               | 0.034                                             | 5.16                |
| MnZrO <sub>x</sub> | 9.13                                                | 0.019                                             | 8.27                |
| FeZrO <sub>x</sub> | 12.81                                               | 0.016                                             | 4.89                |
| CoZrO <sub>x</sub> | 27.16                                               | 0.039                                             | 5.73                |
| NiZrO <sub>x</sub> | 14.61                                               | 0.025                                             | 6.87                |
| ZnZrO <sub>x</sub> | 31.68                                               | 0.049                                             | 6.24                |
